# Supplementary material for: A Review of the Use of Tanning Beds as a Dermatological Treatment
Source: PubMed Central journal article supplement — Dermatol Ther (Heidelb). 2015 Mar 4;5(1):37–51. doi: 10.1007/s13555-015-0071-8 (PMC4374067; doi:10.1007/s13555-015-0071-8), 2015-03-04
Supplement: 13555_2015_71_MOESM1_ESM.pdf [file 13555_2015_71_MOESM1_ESM.pdf]

- Phototherapy is a treatment for many dermatologic conditions such as psoriasis, atopic dermatitis, and mycosis fungoides.
- Some patients find in-office phototherapy to be inconvenient or inaccessible, which may exclude the use of phototherapy from the dermatologist's treatment arsenal in these patients.
- Commercial tanning beds could be used as a more convenient alternative to in-office phototherapy for patients who would otherwise have no access to phototherapy as a treatment option.
- This review demonstrates that commercial tanning beds have the potential to be effective in the treatment of psoriasis, acne, atopic dermatitis, hand eczema, mycosis fungoides, vitiligo, and pruritus.

This summary slide represents the opinions of the authors. This manuscript was not supported by any grants. The Center for Dermatology Research is supported by an unrestricted educational grant from Galderma Laboratories, L.P. For a full list of acknowledgments and conflicts of interest for all authors of this article, please see the full text online. Copyright © The Author(s) 2015. Creative Commons Attribution Noncommercial License (CC BY-NC).
